# Supplementary material for: Potential Impact of Environmental Pollution by Human Antivirals on Avian Influenza Virus Evolution
Source: Animals (Basel). 2023 Mar 23;13(7):1127. doi: 10.3390/ani13071127 (PMC10093092; doi:10.3390/ani13071127)
Supplement: Supplementary file 1 [file animals-13-01127-s001.zip › Document S2.xlsx]

## Sheet: Large AS
ID	GenBank	Country	Year
AB436550CjpE0Y2008	AB436550	jp	2008
AB436736CjpE0Y2008	AB436736	jp	2008
AB458239CjpE0Y2008	AB458239	jp	2008
AB458247CjpE0Y2008	AB458247	jp	2008
AB610972CjpE1Y2011	AB610972	jp	2011
AB612901CjpE1Y2010	AB612901	jp	2010
AB612909CjpE1Y2010	AB612909	jp	2010
AB615237CjpE1Y2011	AB615237	jp	2011
AB617579CjpE1Y2011	AB617579	jp	2011
AB629713CjpE1Y2011	AB629713	jp	2011
AB675739CjpE1Y2011	AB675739	jp	2011
AB675740CjpE1Y2011	AB675740	jp	2011
AB675741CjpE1Y2011	AB675741	jp	2011
AB684240CjpE1Y2010	AB684240	jp	2010
AB684241CjpE1Y2010	AB684241	jp	2010
AB684242CjpE1Y2011	AB684242	jp	2011
AB684243CjpE1Y2011	AB684243	jp	2011
AB684246CjpE1Y2011	AB684246	jp	2011
AB684248CjpE1Y2011	AB684248	jp	2011
AB684249CjpE1Y2011	AB684249	jp	2011
AB684250CjpE1Y2011	AB684250	jp	2011
AB684251CjpE1Y2011	AB684251	jp	2011
AB684253CjpE1Y2011	AB684253	jp	2011
AB684254CjpE1Y2011	AB684254	jp	2011
AB684255CjpE1Y2011	AB684255	jp	2011
AB684256CjpE1Y2011	AB684256	jp	2011
AB684257CjpE1Y2011	AB684257	jp	2011
AB684259CjpE1Y2011	AB684259	jp	2011
AB684260CjpE1Y2011	AB684260	jp	2011
AB684261CjpE1Y2011	AB684261	jp	2011
AB684262CjpE1Y2011	AB684262	jp	2011
AB684263CjpE1Y2011	AB684263	jp	2011
AB760239CjpE1Y2010	AB760239	jp	2010
AB760247CjpE1Y2010	AB760247	jp	2010
AB760255CjpE1Y2010	AB760255	jp	2010
AB760263CjpE1Y2010	AB760263	jp	2010
AB760271CjpE1Y2010	AB760271	jp	2010
AB760279CjpE1Y2011	AB760279	jp	2011
CY036053ChkE0Y2007	CY036053	hk	2007
CY036061ChkE0Y2007	CY036061	hk	2007
CY036069ChkE0Y2007	CY036069	hk	2007
CY036077ChkE0Y2007	CY036077	hk	2007
CY036085ChkE0Y2007	CY036085	hk	2007
CY036093ChkE0Y2007	CY036093	hk	2007
CY036101ChkE0Y2007	CY036101	hk	2007
CY036109ChkE0Y2007	CY036109	hk	2007
CY036117ChkE0Y2007	CY036117	hk	2007
CY036125ChkE0Y2007	CY036125	hk	2007
CY036133ChkE0Y2007	CY036133	hk	2007
CY036141ChkE0Y2007	CY036141	hk	2007
CY036149ChkE0Y2007	CY036149	hk	2007
CY036157ChkE0Y2007	CY036157	hk	2007
CY036165ChkE0Y2007	CY036165	hk	2007
CY036173ChkE0Y2007	CY036173	hk	2007
CY036181ChkE0Y2007	CY036181	hk	2007
CY036189ChkE0Y2007	CY036189	hk	2007
CY036197ChkE0Y2007	CY036197	hk	2007
CY036205ChkE0Y2007	CY036205	hk	2007
CY036213ChkE0Y2007	CY036213	hk	2007
CY036221ChkE0Y2007	CY036221	hk	2007
CY036229ChkE0Y2008	CY036229	hk	2008
CY036237ChkE0Y2008	CY036237	hk	2008
CY036245ChkE0Y2008	CY036245	hk	2008
CY036253ChkE0Y2008	CY036253	hk	2008
CY036261ChkE0Y2008	CY036261	hk	2008
CY110738CjpE1Y2011	CY110738	jp	2011
DQ320923ChkE0Y2004	DQ320923	hk	2004
DQ320924ChkE0Y2004	DQ320924	hk	2004
DQ320925ChkE0Y2005	DQ320925	hk	2005
DQ992836ChkE0Y2006	DQ992836	hk	2006
DQ992838ChkE0Y2006	DQ992838	hk	2006
DQ992839ChkE0Y2006	DQ992839	hk	2006
DQ992840ChkE0Y2006	DQ992840	hk	2006
DQ992841ChkE0Y2006	DQ992841	hk	2006
DQ992842ChkE0Y2006	DQ992842	hk	2006
DQ992843ChkE0Y2006	DQ992843	hk	2006
DQ992844ChkE0Y2006	DQ992844	hk	2006
DQ992845ChkE0Y2006	DQ992845	hk	2006
DQ992846ChkE0Y2006	DQ992846	hk	2006
DQ992847ChkE0Y2006	DQ992847	hk	2006
DQ992848ChkE0Y2006	DQ992848	hk	2006
DQ992849ChkE0Y2006	DQ992849	hk	2006
DQ992850ChkE0Y2006	DQ992850	hk	2006
GQ412051CskE0Y2008	GQ412051	sk	2008
GQ412052CskE0Y2008	GQ412052	sk	2008
GQ412053CskE0Y2008	GQ412053	sk	2008
GQ412054CskE0Y2008	GQ412054	sk	2008
GQ412055CskE0Y2008	GQ412055	sk	2008
GQ412056CskE0Y2008	GQ412056	sk	2008
GU050310ChkE0Y2007	GU050310	hk	2007
GU050317ChkE0Y2007	GU050317	hk	2007
GU050325ChkE0Y2007	GU050325	hk	2007
GU050333ChkE0Y2007	GU050333	hk	2007
GU050341ChkE0Y2007	GU050341	hk	2007
HQ695910CskE1Y2010	HQ695910	sk	2010
JN807973CskE1Y2011	JN807973	sk	2011
JN807974CskE1Y2011	JN807974	sk	2011
JN807975CskE1Y2011	JN807975	sk	2011
JN807976CskE1Y2010	JN807976	sk	2010
JN807977CskE1Y2011	JN807977	sk	2011
JN807978CskE1Y2011	JN807978	sk	2011
JN807979CskE1Y2010	JN807979	sk	2010
JN807980CskE1Y2011	JN807980	sk	2011
JN807981CskE1Y2011	JN807981	sk	2011
JN807982CskE1Y2011	JN807982	sk	2011
JN807983CskE1Y2011	JN807983	sk	2011
JN807984CskE1Y2011	JN807984	sk	2011
JN807985CskE1Y2010	JN807985	sk	2010
JN807986CskE1Y2011	JN807986	sk	2011
JN807987CskE1Y2011	JN807987	sk	2011
JN807988CskE1Y2011	JN807988	sk	2011
JN807989CskE1Y2011	JN807989	sk	2011
JN807990CskE1Y2011	JN807990	sk	2011
JN807991CskE1Y2011	JN807991	sk	2011
JN807992CskE1Y2011	JN807992	sk	2011
JN807993CskE1Y2010	JN807993	sk	2010
JN807994CskE1Y2011	JN807994	sk	2011
JN807995CskE1Y2011	JN807995	sk	2011
JN807996CskE1Y2011	JN807996	sk	2011
JN807997CskE1Y2011	JN807997	sk	2011
JN807998CskE1Y2011	JN807998	sk	2011
JN807999CskE1Y2011	JN807999	sk	2011
JQ710449CskE1Y2010	JQ710449	sk	2010
JQ710457CskE1Y2010	JQ710457	sk	2010

## Sheet: Limited AS
ID	GenBank	Country	Year
AB520708CmoE1Y2009	AB520708	mo	2009
AB523759CmoE1Y2009	AB523759	mo	2009
AB523767CmoE1Y2009	AB523767	mo	2009
AB523775CmoE1Y2009	AB523775	mo	2009
AB569348CmoE1Y2010	AB569348	mo	2010
AY518362CchE0Y2003	AY518362	ch	2003
AY737296CchE0Y2004	AY737296	ch	2004
CY028969CchE0Y2004	CY028969	ch	2004
CY028970CchE0Y2004	CY028970	ch	2004
CY030881CchE0Y2006	CY030881	ch	2006
CY030889CchE0Y2006	CY030889	ch	2006
CY030897CchE0Y2006	CY030897	ch	2006
CY030905CchE0Y2006	CY030905	ch	2006
CY030913CchE0Y2006	CY030913	ch	2006
CY030921CchE0Y2006	CY030921	ch	2006
CY030929CchE0Y2006	CY030929	ch	2006
CY030937CchE0Y2006	CY030937	ch	2006
CY030945CchE0Y2006	CY030945	ch	2006
CY030953CchE0Y2006	CY030953	ch	2006
CY030961CchE0Y2006	CY030961	ch	2006
CY030969CchE0Y2006	CY030969	ch	2006
CY030977CchE0Y2006	CY030977	ch	2006
CY030985CchE0Y2006	CY030985	ch	2006
CY063318CchE1Y2009	CY063318	ch	2009
DQ095629CchE0Y2005	DQ095629	ch	2005
DQ320877CchE0Y2004	DQ320877	ch	2004
DQ320878CchE0Y2004	DQ320878	ch	2004
DQ320896CchE0Y2005	DQ320896	ch	2005
DQ320897CchE0Y2005	DQ320897	ch	2005
DQ320911CchE0Y2005	DQ320911	ch	2005
DQ320912CchE0Y2005	DQ320912	ch	2005
DQ320913CchE0Y2005	DQ320913	ch	2005
DQ520855CchE0Y2005	DQ520855	ch	2005
DQ520856CchE0Y2005	DQ520856	ch	2005
DQ992715CchE0Y2005	DQ992715	ch	2005
DQ992716CchE0Y2005	DQ992716	ch	2005
DQ992717CchE0Y2005	DQ992717	ch	2005
DQ992718CchE0Y2005	DQ992718	ch	2005
DQ992719CchE0Y2005	DQ992719	ch	2005
DQ992720CchE0Y2005	DQ992720	ch	2005
DQ992721CchE0Y2005	DQ992721	ch	2005
DQ992723CchE0Y2005	DQ992723	ch	2005
DQ992725CchE0Y2005	DQ992725	ch	2005
DQ992726CchE0Y2005	DQ992726	ch	2005
DQ992727CchE0Y2005	DQ992727	ch	2005
DQ992728CchE0Y2005	DQ992728	ch	2005
DQ992729CchE0Y2005	DQ992729	ch	2005
DQ992730CchE0Y2005	DQ992730	ch	2005
DQ992731CchE0Y2005	DQ992731	ch	2005
DQ992732CchE0Y2005	DQ992732	ch	2005
DQ992733CchE0Y2005	DQ992733	ch	2005
DQ992734CchE0Y2005	DQ992734	ch	2005
DQ992735CchE0Y2005	DQ992735	ch	2005
DQ992736CchE0Y2005	DQ992736	ch	2005
DQ992737CchE0Y2005	DQ992737	ch	2005
DQ992738CchE0Y2005	DQ992738	ch	2005
DQ992739CchE0Y2005	DQ992739	ch	2005
DQ992741CchE0Y2006	DQ992741	ch	2006
DQ992742CchE0Y2006	DQ992742	ch	2006
DQ992743CchE0Y2006	DQ992743	ch	2006
DQ992744CchE0Y2006	DQ992744	ch	2006
DQ992745CchE0Y2006	DQ992745	ch	2006
DQ992746CchE0Y2006	DQ992746	ch	2006
DQ992747CchE0Y2006	DQ992747	ch	2006
DQ992748CchE0Y2006	DQ992748	ch	2006
DQ992749CchE0Y2006	DQ992749	ch	2006
DQ992750CchE0Y2006	DQ992750	ch	2006
DQ992751CchE0Y2005	DQ992751	ch	2005
DQ992752CchE0Y2005	DQ992752	ch	2005
DQ992754CchE0Y2005	DQ992754	ch	2005
DQ992755CchE0Y2005	DQ992755	ch	2005
DQ992756CchE0Y2005	DQ992756	ch	2005
DQ992757CchE0Y2005	DQ992757	ch	2005
DQ992758CchE0Y2005	DQ992758	ch	2005
DQ992759CchE0Y2005	DQ992759	ch	2005
DQ992760CchE0Y2005	DQ992760	ch	2005
DQ992761CchE0Y2005	DQ992761	ch	2005
DQ992762CchE0Y2005	DQ992762	ch	2005
DQ992763CchE0Y2006	DQ992763	ch	2006
DQ992764CchE0Y2006	DQ992764	ch	2006
DQ992767CchE0Y2006	DQ992767	ch	2006
DQ992776CchE0Y2005	DQ992776	ch	2005
DQ992777CchE0Y2005	DQ992777	ch	2005
DQ992779CchE0Y2006	DQ992779	ch	2006
DQ992782CchE0Y2006	DQ992782	ch	2006
DQ992783CchE0Y2006	DQ992783	ch	2006
DQ992784CchE0Y2006	DQ992784	ch	2006
DQ992785CchE0Y2006	DQ992785	ch	2006
DQ992786CchE0Y2006	DQ992786	ch	2006
DQ992787CchE0Y2005	DQ992787	ch	2005
DQ992788CchE0Y2005	DQ992788	ch	2005
DQ992790CchE0Y2006	DQ992790	ch	2006
DQ992791CchE0Y2006	DQ992791	ch	2006
DQ992792CchE0Y2006	DQ992792	ch	2006
DQ992793CchE0Y2006	DQ992793	ch	2006
DQ992795CchE0Y2005	DQ992795	ch	2005
DQ992796CchE0Y2005	DQ992796	ch	2005
DQ992797CchE0Y2005	DQ992797	ch	2005
DQ992798CchE0Y2005	DQ992798	ch	2005
DQ992799CchE0Y2005	DQ992799	ch	2005
DQ992800CchE0Y2005	DQ992800	ch	2005
DQ992803CchE0Y2005	DQ992803	ch	2005
DQ992806CchE0Y2005	DQ992806	ch	2005
DQ992807CchE0Y2005	DQ992807	ch	2005
DQ992808CchE0Y2005	DQ992808	ch	2005
DQ992811CchE0Y2005	DQ992811	ch	2005
DQ992812CchE0Y2005	DQ992812	ch	2005
DQ992819CchE0Y2005	DQ992819	ch	2005
DQ992820CchE0Y2005	DQ992820	ch	2005
DQ992821CchE0Y2005	DQ992821	ch	2005
DQ992822CchE0Y2005	DQ992822	ch	2005
DQ992823CchE0Y2005	DQ992823	ch	2005
DQ992825CchE0Y2005	DQ992825	ch	2005
DQ992826CchE0Y2005	DQ992826	ch	2005
DQ992827CchE0Y2005	DQ992827	ch	2005
DQ992828CchE0Y2005	DQ992828	ch	2005
DQ992829CchE0Y2005	DQ992829	ch	2005
DQ992830CchE0Y2005	DQ992830	ch	2005
DQ992831CchE0Y2006	DQ992831	ch	2006
DQ992832CchE0Y2006	DQ992832	ch	2006
DQ992833CchE0Y2006	DQ992833	ch	2006
DQ993022CchE0Y2006	DQ993022	ch	2006
DQ993023CchE0Y2006	DQ993023	ch	2006
DQ993024CchE0Y2006	DQ993024	ch	2006
DQ993025CchE0Y2006	DQ993025	ch	2006
DQ993026CchE0Y2006	DQ993026	ch	2006
DQ993027CchE0Y2006	DQ993027	ch	2006
DQ993028CchE0Y2006	DQ993028	ch	2006
DQ993029CchE0Y2006	DQ993029	ch	2006
DQ993030CchE0Y2006	DQ993030	ch	2006
DQ993031CchE0Y2006	DQ993031	ch	2006
DQ993114CchE0Y2006	DQ993114	ch	2006
DQ993117CchE0Y2006	DQ993117	ch	2006
EU195392CchE0Y2005	EU195392	ch	2005
EU195400CchE0Y2005	EU195400	ch	2005
EU329177CchE0Y2005	EU329177	ch	2005
EU594349CchE0Y2006	EU594349	ch	2006
EU676174CruE0Y2008	EU676174	ru	2008
FJ654295CruE0Y2008	FJ654295	ru	2008
FJ784841CchE0Y2006	FJ784841	ch	2006
FJ784842CchE0Y2007	FJ784842	ch	2007
FJ784843CchE0Y2006	FJ784843	ch	2006
FJ784844CchE0Y2006	FJ784844	ch	2006
FJ784845CchE0Y2006	FJ784845	ch	2006
FJ784846CchE0Y2006	FJ784846	ch	2006
FJ784847CchE0Y2007	FJ784847	ch	2007
FJ784848CchE0Y2007	FJ784848	ch	2007
FJ784849CchE0Y2007	FJ784849	ch	2007
FJ784850CchE0Y2007	FJ784850	ch	2007
FJ784851CchE0Y2007	FJ784851	ch	2007
FJ784852CchE0Y2007	FJ784852	ch	2007
FJ784853CchE0Y2007	FJ784853	ch	2007
FJ784854CchE0Y2006	FJ784854	ch	2006
FJ784855CchE0Y2006	FJ784855	ch	2006
FJ784856CchE0Y2006	FJ784856	ch	2006
GQ202211CchE0Y2008	GQ202211	ch	2008
GQ386142CruE1Y2009	GQ386142	ru	2009
GQ386150CruE1Y2009	GQ386150	ru	2009
GU182142CchE0Y2007	GU182142	ch	2007
GU182150CchE0Y2007	GU182150	ch	2007
GU182158CchE0Y2008	GU182158	ch	2008
GU220793CchE0Y2007	GU220793	ch	2007
HM172069CchE0Y2005	HM172069	ch	2005
HM172070CchE0Y2005	HM172070	ch	2005
HM172071CchE0Y2005	HM172071	ch	2005
HM172074CchE1Y2009	HM172074	ch	2009
HM172079CchE0Y2008	HM172079	ch	2008
HM172086CchE0Y2008	HM172086	ch	2008
HM172088CchE0Y2007	HM172088	ch	2007
HM172096CchE0Y2007	HM172096	ch	2007
HM172097CchE0Y2006	HM172097	ch	2006
HM172100CchE0Y2005	HM172100	ch	2005
HM172101CchE0Y2006	HM172101	ch	2006
HM172105CchE0Y2004	HM172105	ch	2004
HM172109CchE0Y2006	HM172109	ch	2006
HM172112CchE0Y2005	HM172112	ch	2005
HM172115CchE0Y2006	HM172115	ch	2006
HQ131674CruE1Y2010	HQ131674	ru	2010
HQ630838CruE1Y2010	HQ630838	ru	2010
JF975561CchE1Y2009	JF975561	ch	2009
JN646713CchE1Y2011	JN646713	ch	2011
JN646714CchE1Y2011	JN646714	ch	2011
JN646715CchE1Y2011	JN646715	ch	2011
JN646716CchE1Y2011	JN646716	ch	2011
JN646717CchE1Y2011	JN646717	ch	2011
JN646719CchE1Y2011	JN646719	ch	2011
JQ638673CchE1Y2010	JQ638673	ch	2010
JQ638674CchE1Y2010	JQ638674	ch	2010
